# Supplementary material for: Effects of Apigenin on RBL-2H3, RAW264.7, and HaCaT Cells: Anti-Allergic, Anti-Inflammatory, and Skin-Protective Activities
Source: Int J Mol Sci. 2020 Jun 29;21(13):4620. doi: 10.3390/ijms21134620 (PMC7370139; doi:10.3390/ijms21134620)
Supplement: Supplementary file 1 [file ijms-21-04620-s001.xlsx]

## Sheet: Sheet1
Supplementary Table S1. Primers used in this study
Origin	Cell line	Target	Forward (5' –3')	Reverse (5' –3')	Size (bp)
Mouse	RAW264.7	GAPDH	TGGCCTTCCGTGTTCCTAC	GAGTTGCTGTTGAAGTCGCA	178
		COX-2	CACTACATCCTGACCCACTT	ATGCTCCTGCTTGAGTATGT	696
		iNOS	CCCTTCCGAAGTTTCTGGCAGCAGC	GGCTGTCAGAGCCTCGTGGCTTTGG	497
		TNFα	CCTGTAGCCCACGTCGTAGC	TTGACCTCAGCGCTGAGTTG	374
		IL-6	TGCTGGTGACAACCACGGCC	GTACTCCAGAAGACCAGAGG	308
		IL-1β	CAGGATGAGGACATGAGCACC	CTCTGCAGACTCAAACTCCAC	447
Rat	RBL-2H3	GAPDH	TGCCACTCAGAAGACTGTGG	GGATGCAGGGATGATGTTCT	85
		IL-4	GGATGTAACGACAGCCCTCT	GTGTTCCTTGTTGCCGTAAG	116
		IL-6	GGATGTAACGACAGCCCTCT	TCTGACAGTGCATCATCGCT	114
		IL-13	GCTCTCGCTTGCCTTGGTGGTC	CATCCGAGGCCTTTTGGTTACAG	274
		COX-2	TGACTTTGGCAGGCTGGATT	ACTGCACTTCTGGTACCGTG	139
		TNFα	TCAGCCTCTTCTCATTCCTGC	TTGGTGGTTTGCTACGACGTG	203
		IL-5	CTCTGTTGACGAGCAATGAG	CTCTTGCAGGTAATCCAGGA	239
		FcεR1α	AGATGCCGTAGCTGGAAGAAA	AATGATGGGAAAATGAGTTGTAGC	245
Human	HaCaT	GAPDH	CTTTGTCAAGCTCATTTCCTGG	TCTTCCTCTTGTGCTCTTGC	133
		IVL	GGCCACCCAAACATAAATAACC	CCTAGCGGACCCGAAATAAG	105
		LOR	GAGGTGTTTTCCAGGGGCA	TGGGGTTGGGAGGTAGTTGTA	168
		HAS-1	GTCTCCAGGGAGGGTATTTATTG	TCCTGATCACACAGTAGAAATGG	112
		HAS-2	CTGGGACGAAGTGTGGATTATG	CTCCAACCATGGGATCTTCTTC	109
		HAS-3	AGGTATGGCAGTAGAGGATGA	CCTGCTCACCATTGGAGAAT	121
		HBD-1	TCTGCTGTTTACTCTCTGCTTAC	GGCAGGCAGAATAGAGACATT	131
		HBD-2	GATGCCTCTTCCAGGTGTTT	CCACAGGTGCCAATTTGTTTAT	117
		HBD-3	CCAGGTCATGGAGGAATCATAAA	CGATCTGTTCCTCCTTTGGAAG	103
		LL-37	CCCTGCTGGGTGATTTCTT	CTCTGTCCTGGGTACAAGATTC	110
